# Supplementary material
Source: PubMed Central journal article supplement (PMC3470824)
Supplement: NIHMS384438-supplement-Supplemental_Table.pdf [file NIHMS384438-supplement-Supplemental_Table.pdf]

**Data Supplement (Web only)**

Table 1. Probability of MMR gene mutation according to PREMM<sub>1,2,6</sub> by type of gene and ascertainment

| PREMM <sub>1,2,6</sub><br>categories | Total |        | No Mutation |        | <i>MLH1</i><br>Mutation |        | <i>MSH2</i><br>Mutation |        | <i>MSH6</i><br>Mutation |        |
|--------------------------------------|-------|--------|-------------|--------|-------------------------|--------|-------------------------|--------|-------------------------|--------|
|                                      | N     | (%)    | N           | (%)    | N                       | (%)    | N                       | (%)    | N                       | (%)    |
| <b>OVERALL COHORT (n=1651)</b>       |       |        |             |        |                         |        |                         |        |                         |        |
| < 5%                                 | 836   | (50.6) | 823         | (58.3) | 3                       | (3.3)  | 6                       | (4.8)  | 4                       | (16.7) |
| 5-9%                                 | 331   | (20.1) | 306         | (21.7) | 9                       | (10.0) | 10                      | (8.0)  | 6                       | (25.0) |
| 10-19%                               | 174   | (10.5) | 151         | (10.7) | 9                       | (10.0) | 9                       | (7.2)  | 5                       | (20.8) |
| 20-29%                               | 68    | (4.1)  | 44          | (3.1)  | 6                       | (6.7)  | 13                      | (10.4) | 5                       | (20.8) |
| 30-39%                               | 53    | (3.2)  | 28          | (2.0)  | 9                       | (10.0) | 15                      | (12.0) | 1                       | (4.2)  |
| ≥ 40%                                | 189   | (11.5) | 60          | (4.2)  | 54                      | (60.0) | 72                      | (57.6) | 3                       | (12.5) |
| Total                                | 1651  | (100)  | 1412        | (100)  | 90                      | (100)  | 125                     | (100)  | 24                      | (100)  |
| <b>POPULATION-BASED (n=1181)</b>     |       |        |             |        |                         |        |                         |        |                         |        |
| < 5%                                 | 738   | (62.5) | 731         | (66.4) | 2                       | (7.4)  | 2                       | (4.6)  | 3                       | (30)   |
| 5-9%                                 | 239   | (20.2) | 225         | (20.4) | 5                       | (18.5) | 5                       | (11.6) | 4                       | (40)   |
| 10-19%                               | 99    | (8.4)  | 92          | (8.4)  | 3                       | (11.1) | 3                       | (7.0)  | 1                       | (10)   |
| 20-29%                               | 31    | (2.6)  | 20          | (1.8)  | 4                       | (14.8) | 6                       | (14.0) | 1                       | (10)   |
| 30-39%                               | 18    | (1.5)  | 10          | (0.9)  | 1                       | (3.7)  | 6                       | (14.0) | 1                       | (10)   |
| ≥ 40%                                | 56    | (4.7)  | 23          | (2.1)  | 12                      | (44.4) | 21                      | (48.8) | 0                       | 0      |
| Total                                | 1181  | (100)  | 1101        | (100)  | 27                      | (100)  | 43                      | (100)  | 10                      | (100)  |
| <b>CLINIC-BASED (n=470)</b>          |       |        |             |        |                         |        |                         |        |                         |        |
| < 5%                                 | 98    | (20.9) | 92          | (29.6) | 1                       | (1.6)  | 4                       | (4.9)  | 1                       | (7.1)  |
| 5-9%                                 | 92    | (19.6) | 81          | (26.1) | 4                       | (6.4)  | 5                       | (6.1)  | 2                       | (14.3) |
| 10-19%                               | 75    | (16.0) | 59          | (19.0) | 6                       | (9.5)  | 6                       | (7.3)  | 4                       | (28.6) |
| 20-29%                               | 37    | (7.9)  | 24          | (7.7)  | 2                       | (3.2)  | 7                       | (8.5)  | 4                       | (28.6) |
| 30-39%                               | 35    | (7.5)  | 18          | (5.8)  | 8                       | (12.7) | 9                       | (11.0) | 0                       | (0)    |
| ≥ 40%                                | 133   | (28.3) | 37          | (11.9) | 42                      | (66.7) | 51                      | (62.2) | 3                       | (21.4) |
| Total                                | 470   | (100)  | 311         | (100)  | 63                      | (100)  | 82                      | (100)  | 14                      | (100)  |

MMR=mismatch repair
